# Supplementary material for: Lattice-mismatch-induced growth of ultrathin Pt shells with high-index facets for boosting oxygen reduction catalysis
Source: Royal Society of Chemistry journal article supplement (doi:10.1039/d0ta05410k), 2020-01-01
Supplement: d0ta05410k1.pdf [file d0ta05410k1.pdf]

Electronic Supplementary Information for

## **Lattice-mismatch-induced growth of ultrathin Pt shells with high-index facets for boosting oxygen reduction catalysis**

Xiang Li,<sup>a\*</sup> Yaming Liu,<sup>b</sup> Wei Bi,<sup>b</sup> Jinglei Bi,<sup>c</sup> Ruiyun Guo,<sup>b</sup> Rui Li,<sup>b</sup> Chaoqi Wang,<sup>b</sup> Qi Zhan,<sup>b</sup> Weicong Wang,<sup>b</sup> Shengchun Yang<sup>c</sup>, Finglei Shi,<sup>d</sup> Jianbo Wu<sup>d</sup> and Mingshang Jin<sup>b\*</sup>

<sup>a</sup> School of Materials and Chemical Engineering, Xi'an Technological University, Xi'an, Shaanxi 710021, China.

<sup>b</sup> Frontier Institute of Science and Technology and State Key Laboratory of Multiphase Flow in Power Engineering, Xi'an Jiaotong University, Xi'an, Shaanxi 710049, China.

<sup>c</sup> Key Laboratory of Shanxi for Advanced Materials and Mesoscopic Physics State Key Laboratory for Mechanical Behavior of Materials, School of Science, Xi'an Jiaotong University, Xi'an, Shaanxi 710049, China.

<sup>d</sup> State Key Laboratory of Metal Matrix Composites, School of Materials Science and Engineering, Shanghai Jiao Tong University, Shanghai 200240, China.

\*To whom correspondence should be addressed. E-mail: jinm@mail.xjtu.edu.cn; xiangli2014@stu.xjtu.edu.cn.

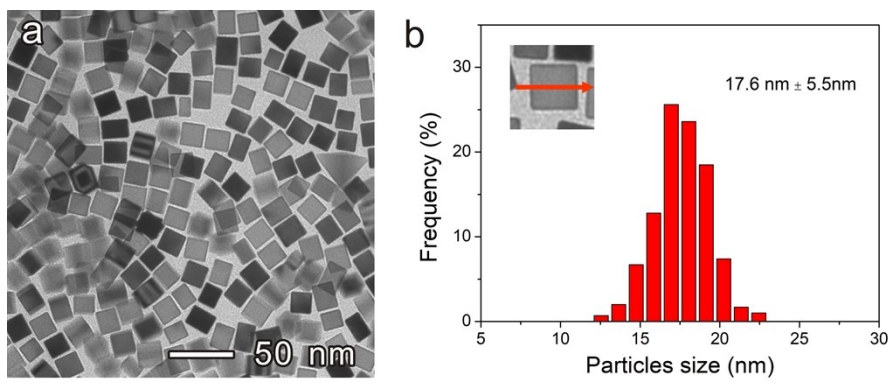

**Figure S1.** TEM image (a) and size distribution (b) of the original Pd nanocubes. The distance was measured along the red arrow of inset image.

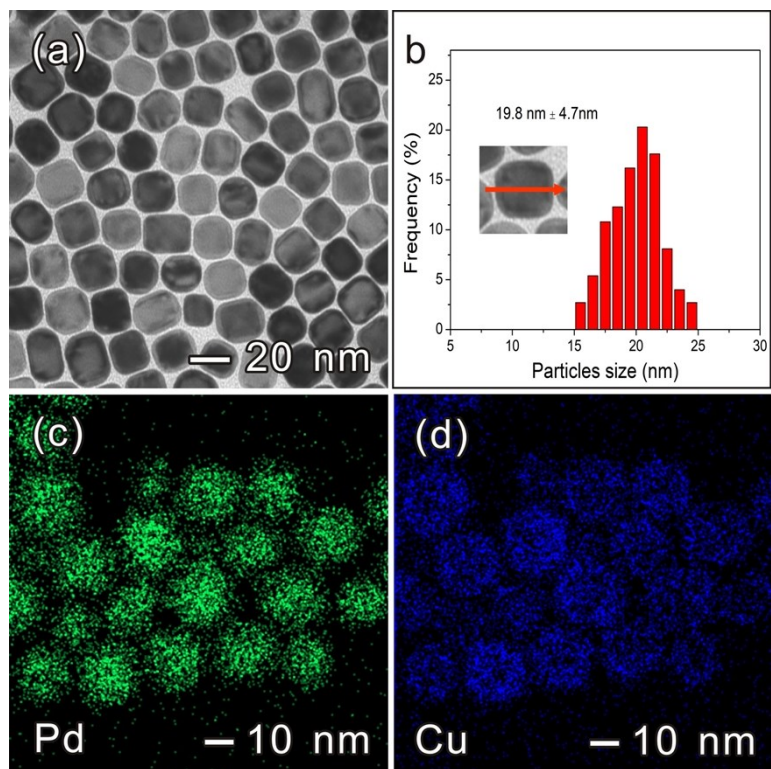

**Figure S2.** TEM image (a), size distribution (b), and element mapping (c, d) of the surface alloyed Pd-Cu nanocubes.

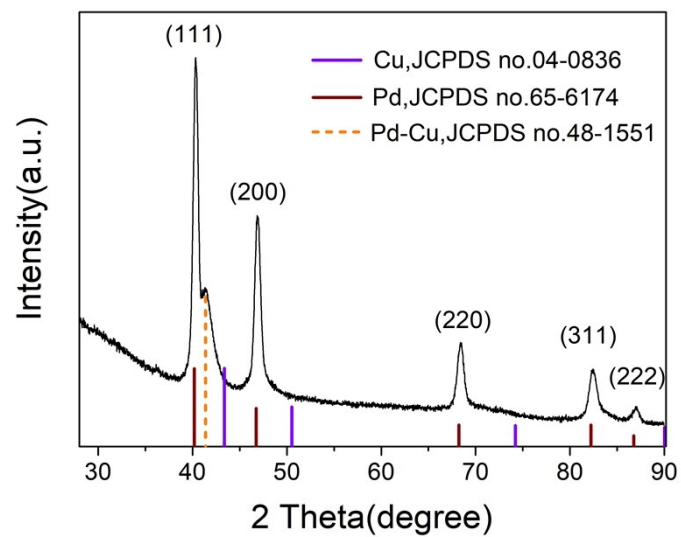

**Figure S3.** The XRD pattern of the surface alloyed Pd-Cu nanocubes.

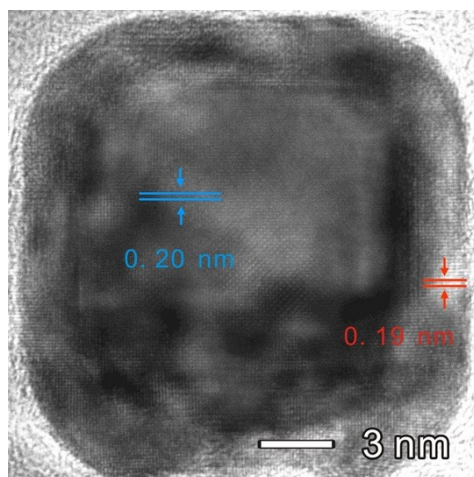

**Figure S4.** HRTEM image of the surface alloyed Pd-Cu nanocubes.

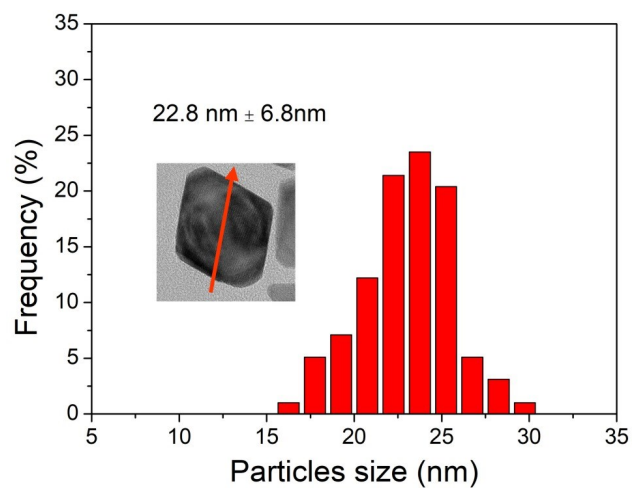

**Figure S5.** Size distribution of the Pd-Cu@Pt octahedral-like core-shell nanocrystals measured from the TEM image. The distance was measured along the red arrow of inset image.

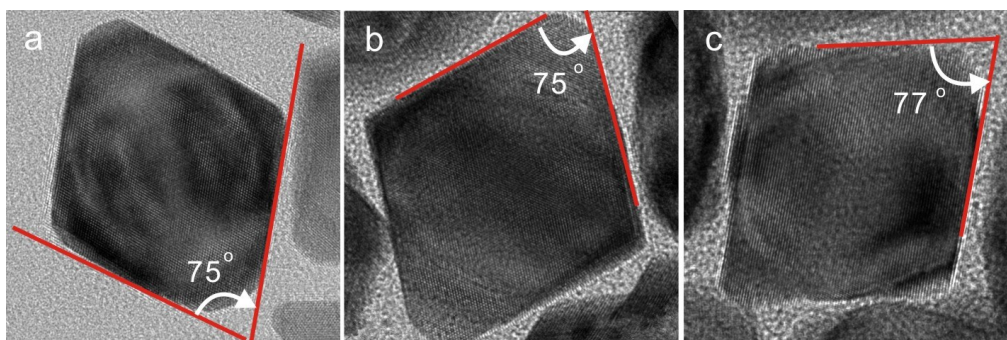

**Figure S6.** Angle Analysis of single octahedral-like Pd-Cu@Pt nanocrystal prepared through standard procedure.

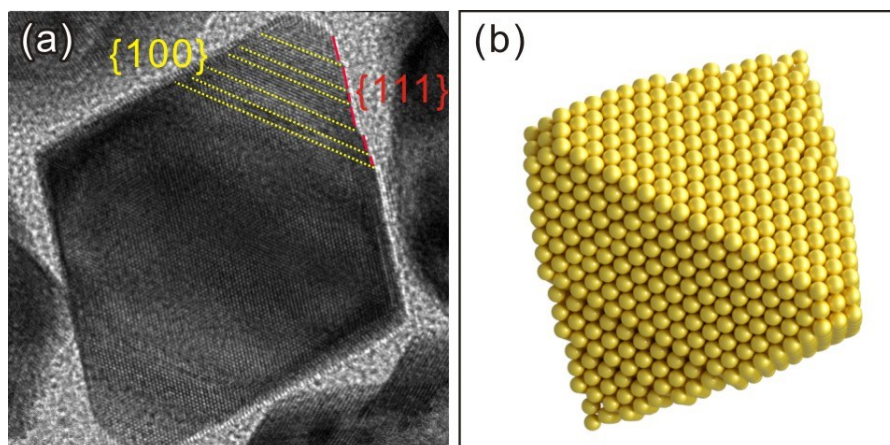

**Figure S7.** HRTEM image and the corresponding atomic model of a single octahedral-like Pd-Cu@Pt nanocrystal oriented along the [011] direction.



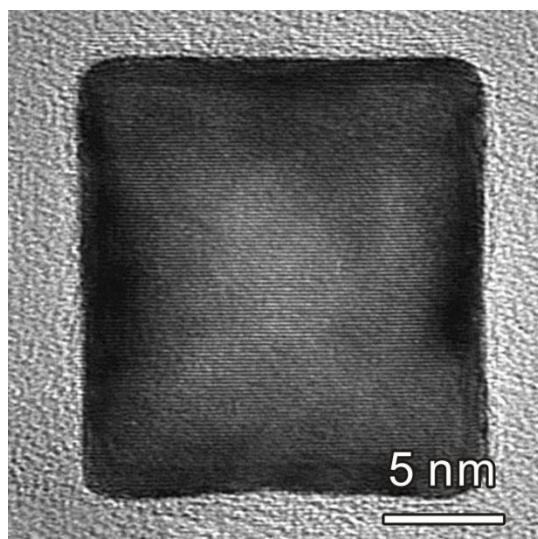

**Figure S8.** HRTEM image of the Pd@Pt nanocubes.

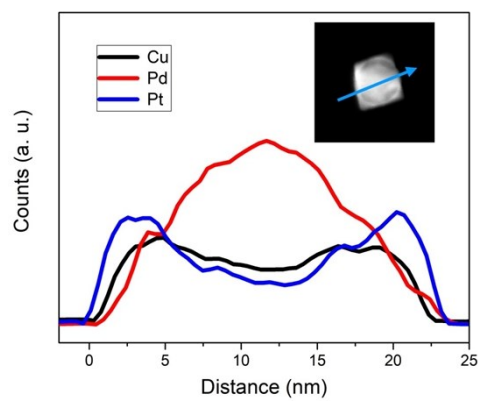

**Figure S9.** Elemental distribution by the EDX line scan analysis along the blue arrow in the insert image.

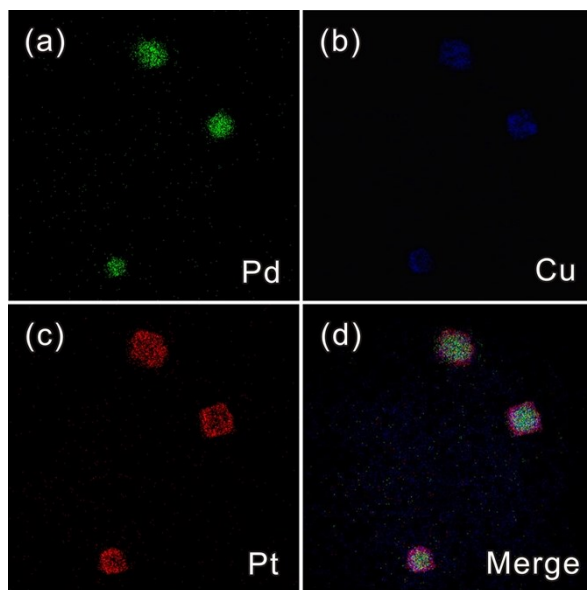

**Figure S10.** Energy-dispersive X-ray spectroscopy mapping of Pd, Cu, and Pt of octahedral-like Pd-Cu@Pt nanocrystal prepared through standard procedure except for that the reaction time is 3 hr.

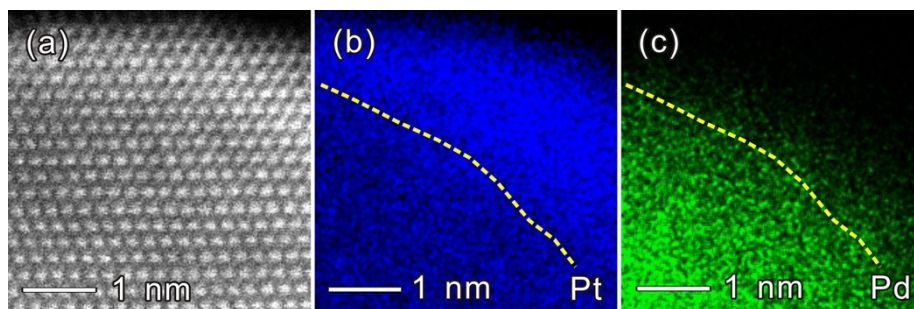

**Figure S11.** (a) High-resolution HAADF image of a surface region of PdCu@Pt nanocrystals. (b, c) Elemental mapping images, where the yellow dashed line denotes a possible boundary between the core and shell.

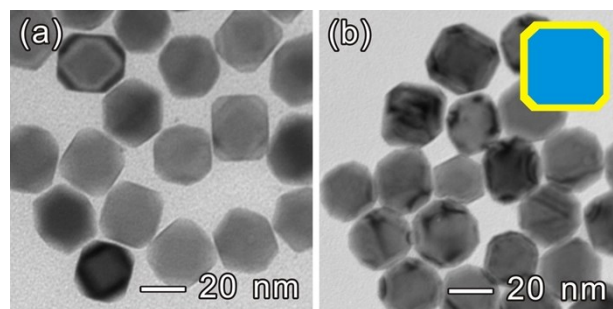

**Figure S12.** TEM images of the (a) truncated Pd nanocubes and (b) Pd@Pt nanocatalysts with the truncated Pd nanocubes as started seeds. The insert image of Figure b is corresponding model for Pd@Pt nanocrystal oriented along the [001] direction, with blue representing Pd while yellow Pt.

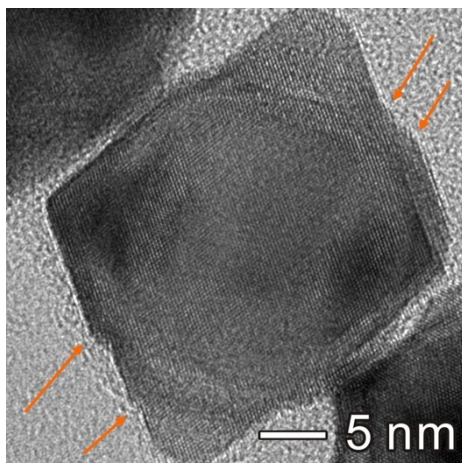

**Figure S13.** HRTEM image of an individual octahedral-like Pd-Cu@Pt nanocrystal prepared with the standard procedure except for that the reaction time was 3 hr.

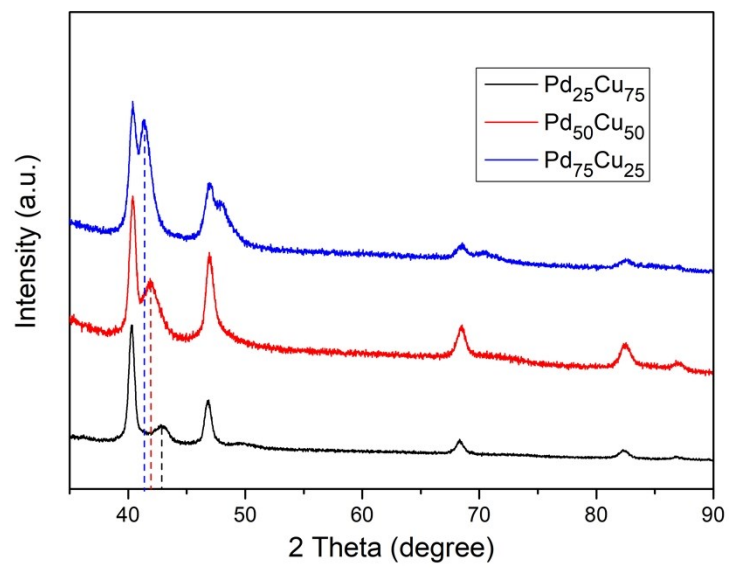

**Figure S14.** XRD patterns of Pd-Cu seeds with three different compositions.

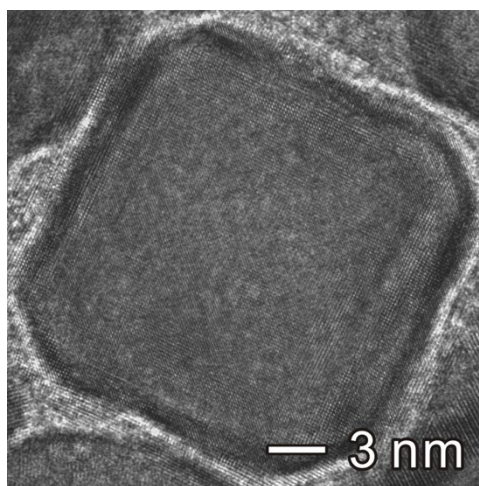

**Figure S15.** HRTEM image of an individual Pd<sub>75</sub>Cu<sub>25</sub>@Pt nanocrystals.



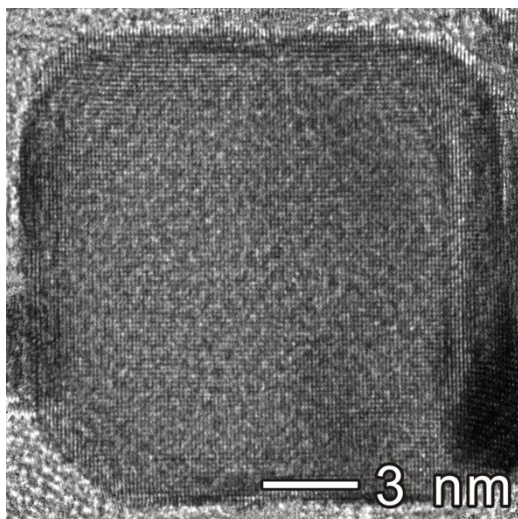

**Figure S16.** HRTEM image of an individual Pd-Cu@Pt nanocrystal prepared using the standard procedure except that the reaction was 0.5 hr.

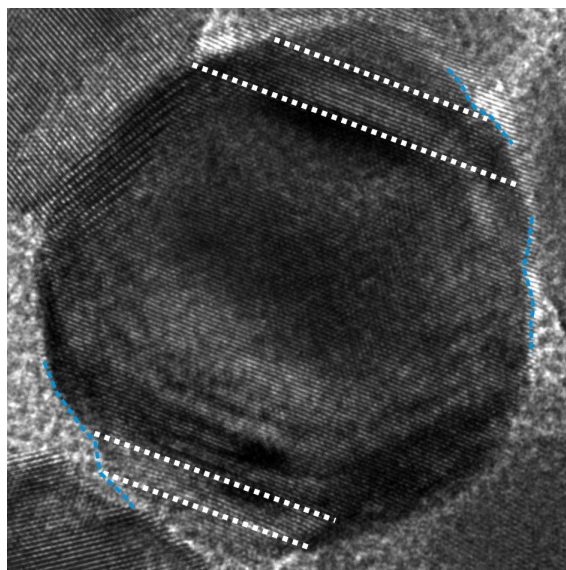

**Figure S17.** Surface structure of a single cuboctahedral-like Pd-Cu@Pt nanocrystal prepared through standard procedure except for that the reaction time is 1.5 hr.

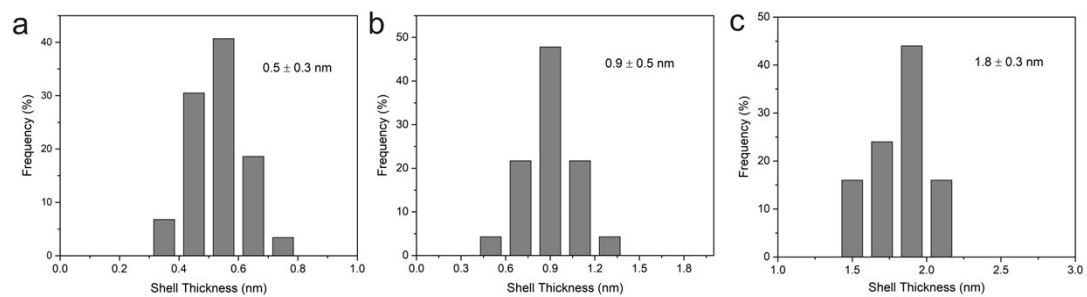

**Figure S18.** Histograms of Pt shell thicknesses of the Pd-Cu@Pt nanocrystals prepared at different reaction times along the [100] direction: (a) 0.5 hr, (b) 1.5 hr, (c) 3 hr.

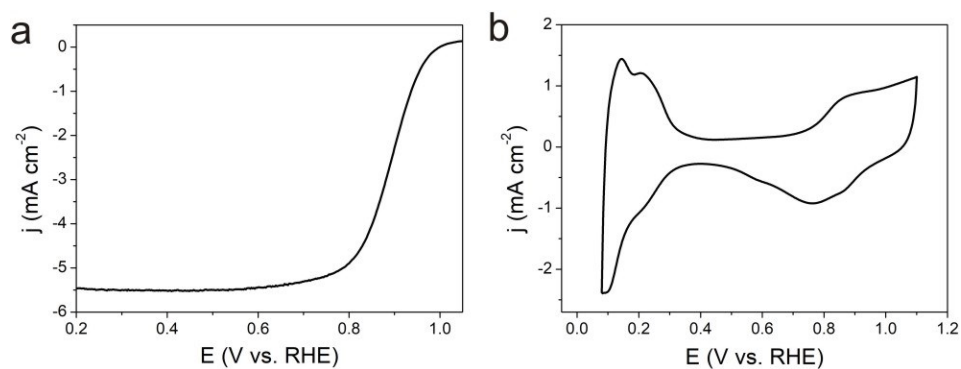

**Figure S19.** Electrochemical ORR properties of the commercial Pt/C catalysts. (a) ORR polarization curve for the catalysts at room temperature in O<sub>2</sub>-saturated 0.1 M aqueous HClO<sub>4</sub> solutions at a sweep rate of 10 mV s<sup>-1</sup> and rotation speed of 1600 rpm. (b) Cyclic voltammetry curve of the catalysts recorded at room temperature in N<sub>2</sub>-purged 0.1 M aqueous HClO<sub>4</sub> solutions with a sweeping rate of 50 mV s<sup>-1</sup>.

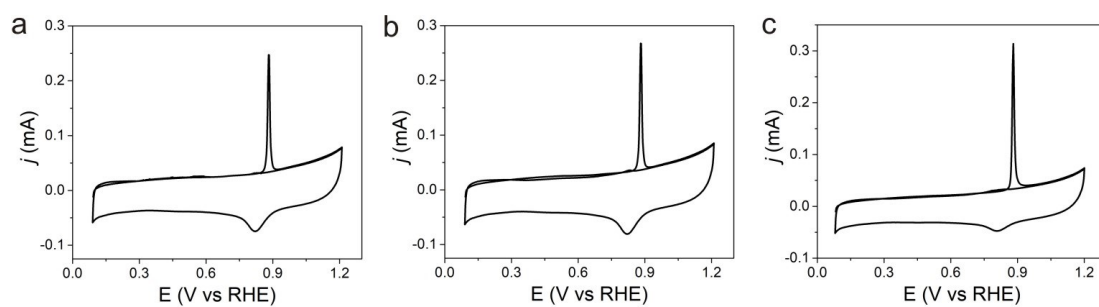

**Figure. S20.** CO-stripping curves of the Pd-Cu@Pt nanocatalysts that are obtained with different reaction times, (a) 0.5 hr, (b) 1.5 hr, (c) 3 hr. The catalyst surface was first saturated with CO by bubbling CO (99.9%) gas into the electrolyte (0.1 M aqueous HClO<sub>4</sub> solution) under open circuit potential for 25 min. The residual CO in the electrolyte was then removed by purging with Ar for 15 min. The CO-stripping curves were recorded with a scanning rate of 50 mV s<sup>-1</sup> from 0.08 to 1.20 V (vs. RHE).

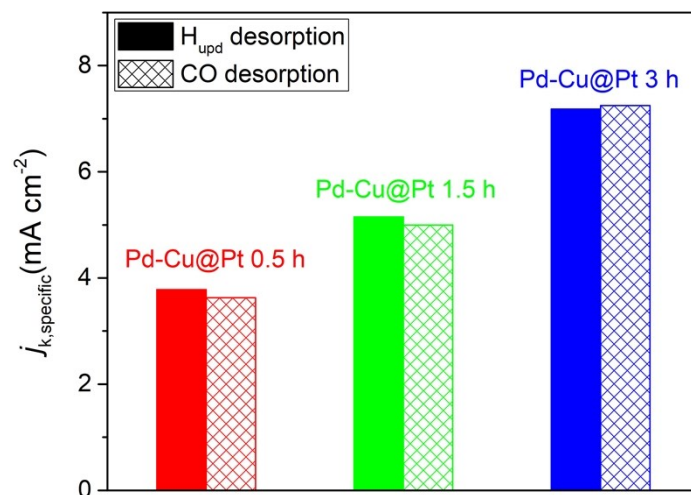

**Figure S21.** The specific activities of the catalysts given as kinetic current density ( $j_k$ ) were normalized to the electrochemically active surface areas (ECSA). The ECSAs were derived from the charges responsible for the H<sub>upd</sub> desorption and CO desorption, respectively.

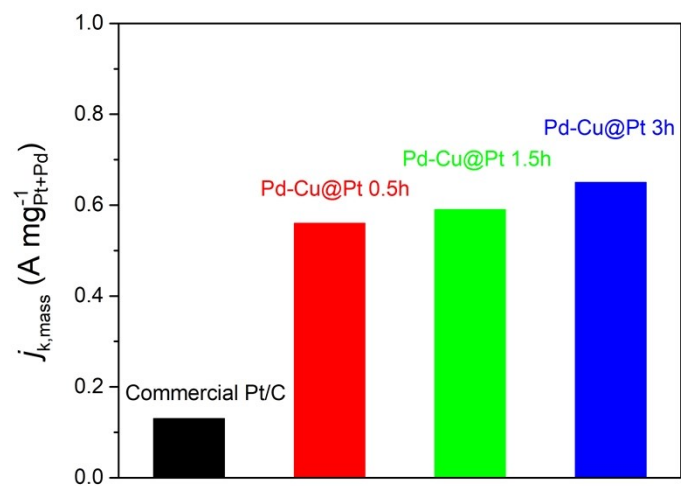

**Figure S22.** The total mass activity of Pt and Pd at 0.9 V vs reversible hydrogen electrode (RHE).

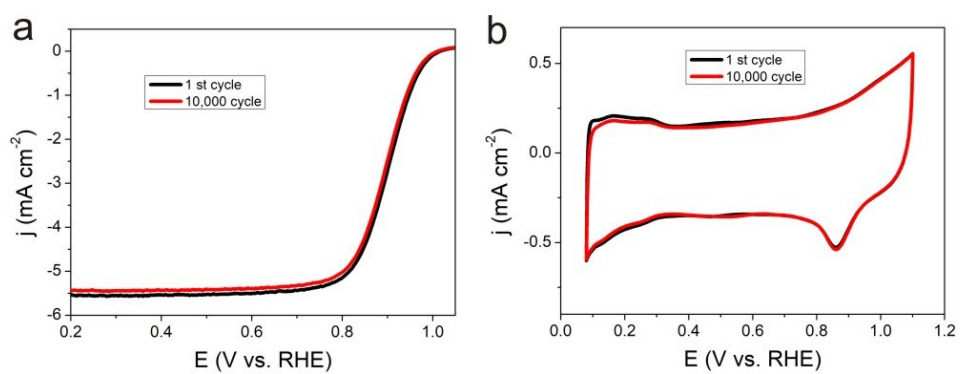

**Figure S23.** Stability of octahedral-like Pd-Cu@Pt nanocatalyst in electrocatalytic ORR. (a) ORR polarization curves of the catalyst before and after accelerated durability test. (b) CV curves of the catalyst before and after accelerated durability test.



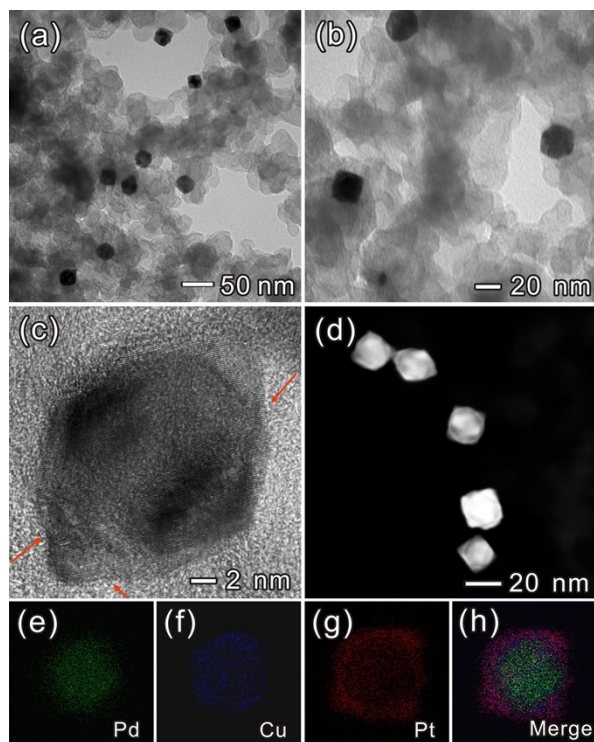

**Figure S24.** TEM characterizations of the octahedral-like Pd-Cu@Pt nanocatalysts after 10,000 cycles of potential sweeps in the ORR. (a) low-magnification TEM image, (b) high-magnification TEM image, (c) HRTEM image, (d) HAADF-STEM image, and (e-h) Energy-dispersive X-ray spectroscopy mapping.

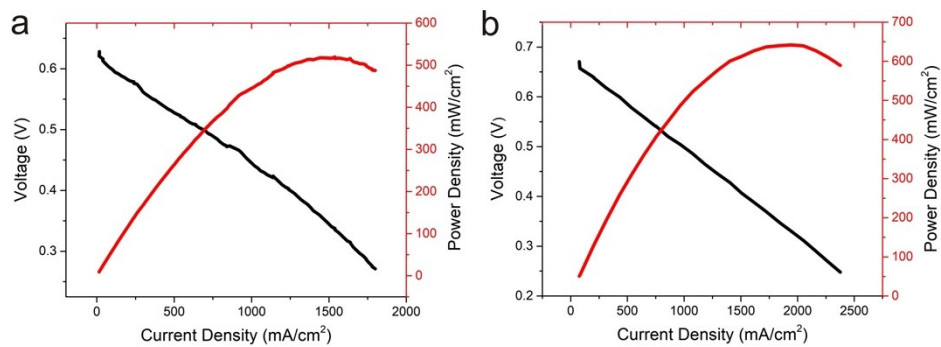

**Figure S25.** Fuel cell performance tested with the standard procedure except for that the backpressure was 120 KPa and the metal loadings was 0.5 mg<sub>Pt</sub> cm<sup>-2</sup> for cathode.

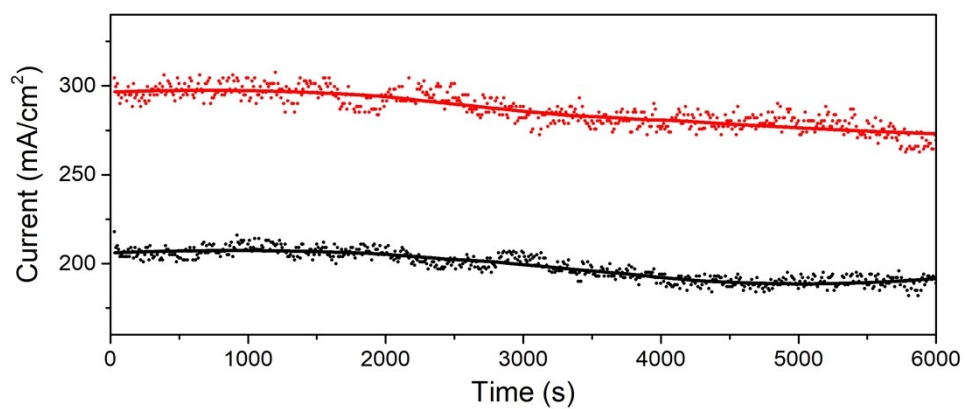

**Figure S26.** CA plots displaying the catalyst stability in FCs at 80 °C for Pd-Cu@Pt (red) and commercial Pt/C (black), which was performed at the potential corresponding to the maximum power output for 6000 s.

**Table S1.** The contents of Pt, Pd and Cu in Pd-Cu@Pt catalysts which are prepared with different times.

| <b>Samples</b>                                                    |    | <b>Pd-Cu@Pt 0.5 hr</b> | <b>Pd-Cu@Pt 1.5 hr</b> | <b>Pd-Cu@Pt 3 hr</b> |
|-------------------------------------------------------------------|----|------------------------|------------------------|----------------------|
| The weight percentage (wt%) of metal calculated from the ICP data | Pd | 54.8                   | 51.2                   | 47.9                 |
|                                                                   | Cu | 19.8                   | 18.6                   | 17.3                 |
|                                                                   | Pt | 25.4                   | 30.2                   | 34.8                 |

**Table S2.** Specific ECSAs of the different type of the Pd-Cu@Pt nanocatalysts. Derived from the charges responsible for the  $H_{\text{upd}}$  and CO desorption respectively.

| Samples                                                     |                                | Pd-Cu@Pt 0.5 hr | Pd-Cu@Pt 1.5 hr | Pd-Cu@Pt 3 hr |
|-------------------------------------------------------------|--------------------------------|-----------------|-----------------|---------------|
| Specific ECSA<br>( $\text{m}^2 \text{g}_{\text{Pt}}^{-1}$ ) | $H_{\text{upd}}$<br>desorption | 36.7            | 33.2            | 29.8          |
|                                                             | CO<br>desorption               | 38.3            | 34.2            | 29.5          |

**Table S3.** Comparison of the oxygen reduction reaction (ORR) electrocatalytic performance of Pt nanoshells with high-density steps with other materials with similar composition and architecture for ORR at 0.9 V versus RHE in acidic electrolyte (0.1 M HClO<sub>4</sub>) published in recent years.

| Catalysts                         | Mass activity<br>(A mg <sub>Pt</sub> <sup>-1</sup> ) | Specific activity<br>(mA cm <sup>-2</sup> ) | References |
|-----------------------------------|------------------------------------------------------|---------------------------------------------|------------|
| Our catalyst                      | 2.14                                                 | 7.18                                        | This work  |
| PtPb/Pt                           | 4.3                                                  | 7.8                                         | [1]        |
| Porous PdCu@Pt                    | 2.8                                                  | 1.19                                        | [2]        |
| PdCu@PtCu                         | 2.55                                                 | 4.33                                        | [3]        |
| Pd@Pt-Ni                          | 2.5                                                  | 2.7                                         | [4]        |
| CoPt/Pt                           | 2.26                                                 | 8.26                                        | [5]        |
| PtFe@Pt                           | 2.11                                                 | 4.34                                        | [6]        |
| PtPb/PtNi                         | 1.92                                                 | 5.16                                        | [7]        |
| Pd <sub>3</sub> Co/Pt             | 1.56                                                 | 0.80                                        | [8]        |
| Pd@Pt Concave Decahedra           | 1.60                                                 | 1.66                                        | [9]        |
| AuNi@Pt                           | 1.52                                                 | 1.18                                        | [10]       |
| Pd@Pt Icosahedra                  | 1.36                                                 | 0.83                                        | [11]       |
| Pt-Based Icosahedral<br>Nanocages | 1.28                                                 | 3.50                                        | [12]       |
| Pt-Enriched Nanocage              | 1.12                                                 | 2.48                                        | [13]       |
| Pd@Pt Octahedra                   | 1.05                                                 | 1.51                                        | [14]       |

|                                      |      |      |      |
|--------------------------------------|------|------|------|
| <b>Au@Pt</b>                         | 0.94 | 1.09 | [15] |
| <b>Pd@PtNi</b>                       | 0.79 | 0.45 | [16] |
| <b>Pt-based Octahedral Nanocages</b> | 0.75 | 1.98 | [17] |
| <b>AuCu@Pt</b>                       | 0.57 | -    | [18] |
| <b>PdCu<sub>5</sub>@Pt</b>           | 0.45 | -    | [19] |
| <b>PtBi@Pt</b>                       | 0.36 | 1.04 | [20] |
| <b>Pd@Pt Nanocube</b>                | 0.34 | 0.33 | [21] |
| <b>PtNi<sub>3</sub>/Pt</b>           | 0.29 | 1.49 | [22] |

---

**Table S4.** Specific ECSAs of the Pt/C catalyst and different type of the Pd-Cu@Pt nanocatalysts.

| <b>Samples</b>                                                           |                                | Commerci<br>al Pt/C | Pd-Cu@Pt<br>0.5 hr | Pd-Cu@Pt<br>1.5 hr | Pd-Cu@Pt<br>3 hr |
|--------------------------------------------------------------------------|--------------------------------|---------------------|--------------------|--------------------|------------------|
| <b>Specific<br/>ECSA (m<sup>2</sup><br/>g<sub>Pt</sub><sup>-1</sup>)</b> | <b>1<sup>st</sup> cycle</b>    | 58                  | 36.7               | 33.2               | 29.8             |
|                                                                          | <b>After 10,000<br/>cycles</b> | 28                  | 26.1               | 27.9               | 27.6             |



**Table S5.** ORR performances of the Pt/C catalyst and different types of the Pd-Cu@Pt nanocatalysts.

| Catalysts       | The first cycle                                            |                                                   | After 10,000 cycles                                        |                                                   |
|-----------------|------------------------------------------------------------|---------------------------------------------------|------------------------------------------------------------|---------------------------------------------------|
|                 | $J_{k,\text{mass}}$<br>(A mg <sub>Pt</sub> <sup>-1</sup> ) | $J_{k,\text{specific}}$<br>(mA cm <sup>-2</sup> ) | $J_{k,\text{mass}}$<br>(A mg <sub>Pt</sub> <sup>-1</sup> ) | $J_{k,\text{specific}}$<br>(mA cm <sup>-2</sup> ) |
| Commercial Pt/C | 0.13                                                       | 0.22                                              | 0.068                                                      | 0.24                                              |
| Pd-Cu@Pt 0.5 hr | 1.39                                                       | 3.78                                              | 0.85                                                       | 3.26                                              |
| Pd-Cu@Pt 1.5 hr | 1.71                                                       | 5.15                                              | 1.33                                                       | 4.76                                              |
| Pd-Cu@Pt 3 hr   | 2.14                                                       | 7.18                                              | 1.88                                                       | 6.81                                              |

**Table S6.** Full cell performances of the Pt/C catalyst and Pd-Cu@Pt nanocatalysts.

| PEMFC                                    | Commercial Pt/C |        |        | Pd-Cu@Pt |        |        |
|------------------------------------------|-----------------|--------|--------|----------|--------|--------|
|                                          | 40 ° C          | 60 ° C | 80 ° C | 40 ° C   | 60 ° C | 80 ° C |
| Open circuit voltages (V)                | 0.24            | 0.29   | 0.45   | 0.36     | 0.46   | 0.56   |
| The maximum power (mW cm <sup>-2</sup> ) | 8.1             | 14.5   | 49.3   | 19.7     | 54.7   | 86.1   |
| The corresponding voltages (V)           | 0.11            | 0.15   | 0.24   | 0.18     | 0.26   | 0.31   |

## References

1. Bu, L.; Zhang, N.; Guo, S.; Zhang, X.; Li, J.; Yao, J.; Wu, T.; Lu, G.; Ma, J.; Su, D.; Huang, X. Biaxially Strained PtPb/Pt Core/Shell Nanoplate Boosts Oxygen Reduction Catalysis. *Science* **2016**, 354, 1410-1414.
2. Shao, M.; Shoemaker, K.; Peles, A.; Kaneko, K.; Protsailo, L. Pt Monolayer on Porous Pd-Cu Alloys as Oxygen Reduction Electrocatalysts. *J. Am. Chem. Soc.* **2010**, 132, 9253-9255.
3. Wang, C.; Sang, X.; Gamler, J.; Chen, D.; Unocic, R.; Skrabalak, S. Facet-Dependent Deposition of Highly Strained Alloyed Shells on Intermetallic Nanoparticles for Enhanced Electrocatalysis. *Nano Lett.* **2017**, 17, 5526-5532.
4. Choi, S.; Shao, M.; Lu, N.; Ruditskiy, A.; Peng, H.; Park, J.; Guerrero, S.; Wang, J.; Kim, M.; Xia, Y. Synthesis and Characterization of Pd@Pt-Ni Core-Shell Octahedra with High Activity toward Oxygen Reduction. *ACS Nano* **2014**, 8, 10363-10371.
5. Li, J.; Sharma, S.; Liu, X.; Pan, Y.; Spendelow, J.; Chi, M.; Jia, Y.; Zhang, P.; Cullen, D.; Xi, Z.; Lin, H.; Yin, Z.; Shen, B.; Muzzio, M.; Yu, C.; Kim, Y.; Peterson, A.; More, K.; Zhu, H.; Sun, S. Hard-Magnet L1<sub>0</sub>-CoPt Nanoparticles Advance Fuel Cell Catalysis. *Joule* **2019**, 3, 124-135.
6. Luo, M.; Sun, Y.; Zhang, X.; Qin, Y.; Li, M.; Li, Y.; Li, C.; Yang, Y.; Wang, L.; Gao, P.; Lu, G.; Guo, S. Stable High-Index Faceted Pt Skin on Zigzag-Like PtFe Nanowires Enhances Oxygen Reduction Catalysis. *Adv. Mater.* **2018**, 30, 1705515.
7. Bu, L.; Shao, Q.; E, B.; Guo, J.; Yao, J.; Huang X. PtPb/PtNi Intermetallic Core/Atomic Layer Shell Octahedra for Efficient Oxygen Reduction Electrocatalysis. *J. Am. Chem. Soc.* **2017**, 139, 9576-9582.
8. Wang, J.; Inada, H.; Wu, L.; Zhu, Y.; Choi, Y.; Liu, P.; Zhou, W.; Adzic, R. Oxygen Reduction on Well-Defined Core-Shell Nanocatalysts: Particle Size, Facet, and Pt Shell Thickness Effects. *J. Am. Chem. Soc.* **2009**, 131, 17298-177302.
9. Wang, X.; Vara, M.; Luo, M.; Huang, H.; Ruditskiy, A.; Park, J.; Bao, S.; Liu, J.; Howe, J.; Chi, M.; Xie, Z.; Xia, Y. Pd@Pt Core-shell Concave Decahedra: A Class of Catalysts for the Oxygen Reduction Reaction with Enhanced Activity and Durability. *J. Am. Chem. Soc.* **2015**, 137, 15036-15042.
10. Chen, G.; Kuttiyiel, K.; Su, D.; Li, M.; Wang, C.; Buceta, D.; Du, C.; Gao, Y.; Yin, G.; Sasaki, K.; Vukmirovic, M.; Adzic, R. Oxygen Reduction Kinetics on Pt Monolayer Shell Highly Affected by the Structure of Bimetallic AuNi Cores. *Chem. Mater.* **2016**, 28, 5274-5281.

11. Wang, X.; Choi, S. I.; Roling, L. T.; Luo, M.; Ma, C.; Zhang, L.; Chi, M.; Liu, J.; Xie, Z.; Herron, J. A.; Mavrikakis, M.; Xia, Y. Palladium-Platinum Core-Shell Icosahedra with Substantially Enhanced Activity and Durability towards Oxygen Reduction. *Nat. Commun.* **2015**, *6*, 7594.
12. Wang, X.; Figueroa-Cosme, L.; Yang, X.; Luo, M.; Liu, J.; Xie, Z.; Xia, Y. Pt-Based Icosahedral Nanocages: Using a Combination of {111} Facets, Twin Defects, and Ultrathin Walls to Greatly Enhance Their Activity toward Oxygen Reduction. *Nano Lett.* **2016**, *16*, 1467-1471.
13. He, D. S.; He, D.; Wang, J.; Lin, Y.; Yin, P.; Hong, X.; Wu, Y.; Li, Y. Ultrathin Icosahedral Pt-Enriched Nanocage with Excellent Oxygen Reduction Reaction Activity. *J. Am. Chem. Soc.* **2016**, *138*, 1494-1497.
14. Zhou, M.; Wang, H.; Vara, M.; Hood, Z.; Luo, M.; Yang, T.; Bao, S.; Chi, M.; Xiao, P.; Zhang, Y.; Xia, Y. Quantitative Analysis of the Reduction Kinetics Responsible for the One-pot Synthesis of Pd-Pt Bimetallic Nanocrystals with Different Structures. *J. Am. Chem. Soc.* **2016**, *138*, 12263-12270.
15. Bian, T.; Zhang, H.; Jiang, Y.; Jin, C.; Wu, J.; Yang, H.; Yang, D. Epitaxial Growth of Twinned Au-Pt Core-Shell Star-Shaped Decahedra as Highly Durable Electrocatalysts. *Nano Lett.* **2015**, *15*, 7808-7815.
16. Zhao, X.; Chen, S.; Fang, Z.; Ding, J.; Sang, W.; Wang, Y.; Zhao, J.; Peng, Z.; Zeng, J. Octahedral Pd@Pt<sub>1.8</sub>Ni Core-Shell Nanocrystals with Ultrathin PtNi Alloy Shells as Active Catalysts for Oxygen Reduction Reaction. *J. Am. Chem. Soc.* **2015**, *137*, 2804-2807.
17. Zhang, L.; Roling, L. T.; Wang, X.; Vara, M.; Chi, M. F.; Liu, J. Y.; Choi, S.; Park, J.; Herron, J. A.; Xie, Z.; Mavrikakis, M.; Xia, Y. Platinum-Based Nanocages with Subnanometer-Thick Walls and Well-Defined, Controllable Facets. *Science* **2015**, *349*, 412-416.
18. Yang, J.; Chen, X.; Yang, X.; Ying, J. Stabilization and compressive strain effect of AuCu core on Pt shell for oxygen reduction reaction. *Energy Environ. Sci.* **2012**, *5*, 8976-8981.
19. Cochell, T.; Manthiram, A. *Langmuir*, **2012**, *28*, 1579-1587.
20. Qin, Y.; Luo, M.; Sun, Y.; Li, C.; Huang, B.; Yang, Y.; Li, Y.; Wang, L.; Guo, S. Intermetallic hcp-PtBi/fcc-Pt Core/Shell Nanoplates Enable Efficient Bifunctional Oxygen Reduction and Methanol Oxidation Electrocatalysis. *ACS Catal.* **2018**, *8*, 5581-5590.
21. Xie, S.; Choi, S. I.; Lu, N.; Roling, L. T.; Herron, J. A.; Zhang, L.; Park, J.; Wang, J.; Kim, M. J.; Xie, Z.; Mavrikakis, M.; Xia, Y. Atomic Layer-by-Layer Deposition of Pt on Pd

Nanocubes for Catalysts with Enhanced Activity and Durability toward Oxygen Reduction. *Nano Lett.* **2014**, 14, 3570-3576.

22. Hasché, F.; Oezaslan, M.; Strasser, P. Activity, Structure and Degradation of Dealloyed PtNi<sub>3</sub> Nanoparticle Electrocatalyst for the Oxygen Reduction Reaction in PEMFC. *J. Electrochem. Soc.* **2012**, 159, B24-B33.
